# Supplementary material for: Easy synthesis of dendrimer-like polymers through a divergent iterative “end-grafting” method
Source: Royal Society of Chemistry journal article supplement (doi:10.1039/c2py20742g), 2012-10-31
Supplement: c2py20742g.pdf [file c2py20742g.pdf]

## Supporting Information

### Easy Synthesis of Dendrimer-like Polymers through A Divergent Iterative “End-grafting” Method

Hefeng Zhang, Jian Zhu, Junpo He\*, Feng Qiu, Hongdong Zhang, Yuliang Yang

State Key Laboratory of Molecular Engineering of Polymers, Department of Macromolecular  
Science, Fudan University, Shanghai, 200433, China

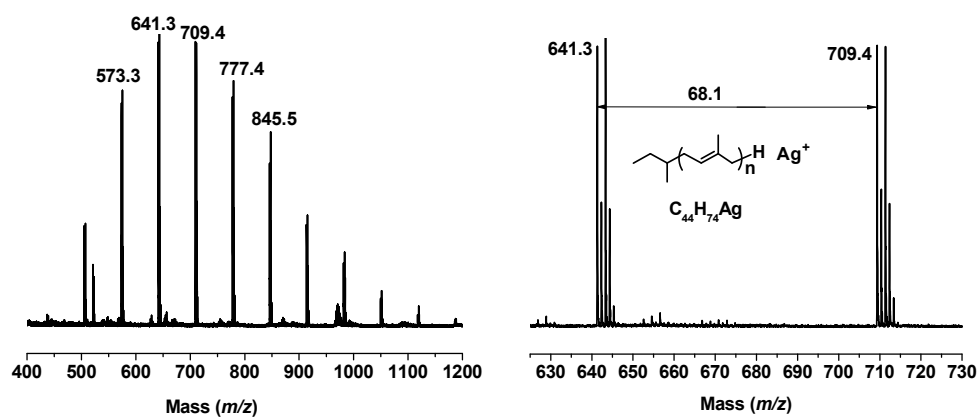

Fig. S1 MALDI-TOF MS spectrum of the PI oligomer used as the branching unit.

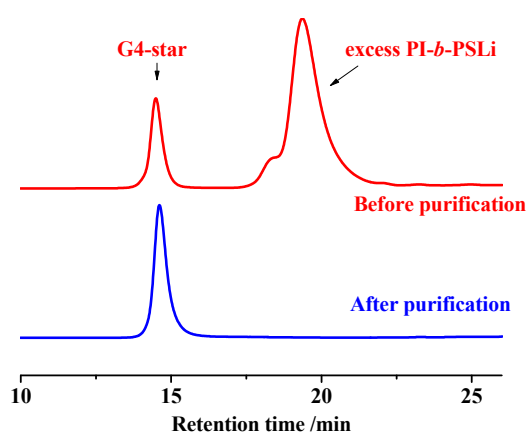

Fig. S2 SEC curves of dendrimer-like PS  $G4_{-star}$  before and after purification.

**Table S1** Viscosities and contraction factor of the dendrimer-like PS

| Entry                     | $M_w$ ( $\times 10^3$ g/mol) | $[\eta]_{\text{linear, theo.}}$ (ml/g) <sup>a</sup> | $[\eta]_{\text{dendrimer-like}}$ (ml/g) <sup>b</sup> | $g'^c$ |
|---------------------------|------------------------------|-----------------------------------------------------|------------------------------------------------------|--------|
| <b>G1-<sub>ISI</sub></b>  | 29.4                         | 20.4                                                | 19.4                                                 | 0.95   |
| <b>G2-<sub>ISI</sub></b>  | 169                          | 71.04                                               | 33.6                                                 | 0.47   |
| <b>G3-<sub>ISI</sub></b>  | 1242                         | 295.0                                               | 43.6                                                 | 0.15   |
| <b>G4-<sub>ISI</sub></b>  | 7512                         | 1066.3                                              | 45.0                                                 | 0.04   |
| <b>G5-<sub>ISI</sub></b>  | 36270                        | 3281.8                                              | 37.2                                                 | 0.01   |
| <b>G1-<sub>star</sub></b> | 50.1                         | 29.8                                                | 16.1                                                 | 0.54   |
| <b>G2-<sub>star</sub></b> | 343                          | 117.7                                               | 25.6                                                 | 0.22   |
| <b>G3-<sub>star</sub></b> | 2230                         | 448.0                                               | 32.0                                                 | 0.07   |
| <b>G4-<sub>star</sub></b> | 10340                        | 1339.6                                              | 32.5                                                 | 0.02   |
| <b>G5-<sub>star</sub></b> | 40770                        | 3567.6                                              | 30.8                                                 | 0.01   |

<sup>a</sup>.  $[\eta]_{\text{linear, theo.}}$  was calculated according to  $[\eta]_{\text{linear, theo.}} = 1.314 \times 10^{-2} M_w^{0.714}$  (G. Meyerhoff and B. Appelt, *Macromolecules*, 1979, **12**, 968); <sup>b</sup> Measured at 30°C in THF; <sup>c</sup>.  $g' = [\eta]_{\text{dendrimer-like}} / [\eta]_{\text{linear, theo.}}$

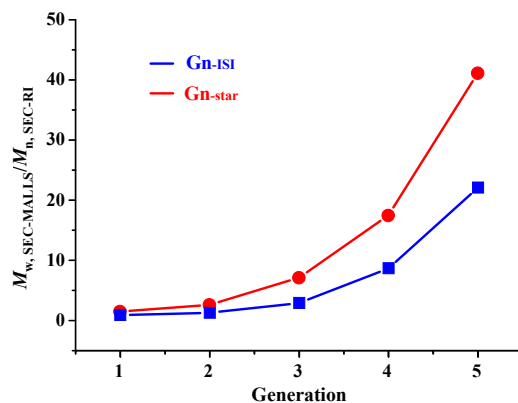

**Fig. S3** Ratios of  $M_{w, \text{SEC-MALLS}}$  to  $M_{n, \text{SEC-RI}}$  of **Gn-<sub>ISI</sub>** and **Gn-<sub>star</sub>** as a function of generation number.

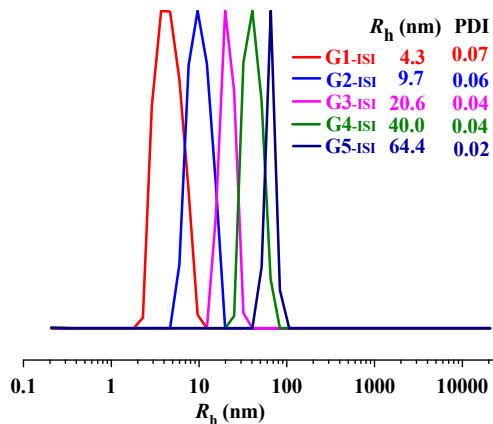

**Fig. S4**  $R_h$ s of the dendrimer-like PS **Gn-<sub>ISI</sub>** increase with generations.

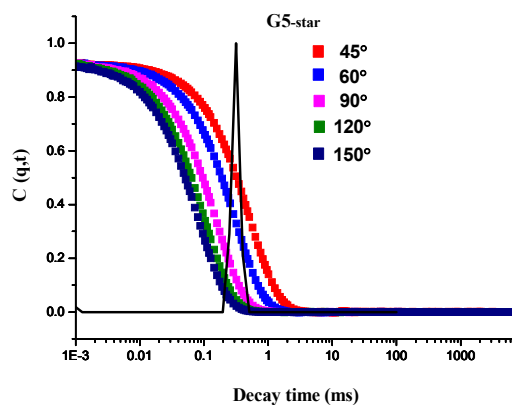

**Fig. S5** DLS results of dendrimer-like star polystyrenes of  $G5_{\text{star}}$  at different angles (in THF), showing no angle dependence in molecular size measurement.

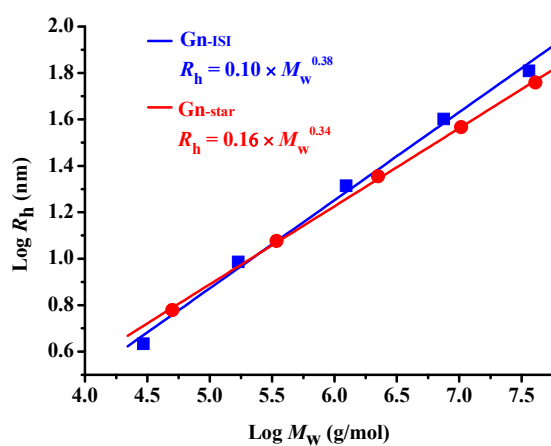

**Fig. S6** Relationships between  $\langle R_h \rangle$  and  $M_w$  in a log-log scale.

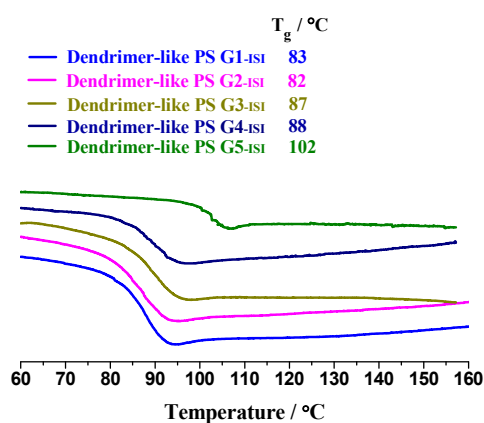

**Fig. S7** DSC results for dendrimer-like products of  $Gn\text{-1SI}$  where  $n = 1-5$ .

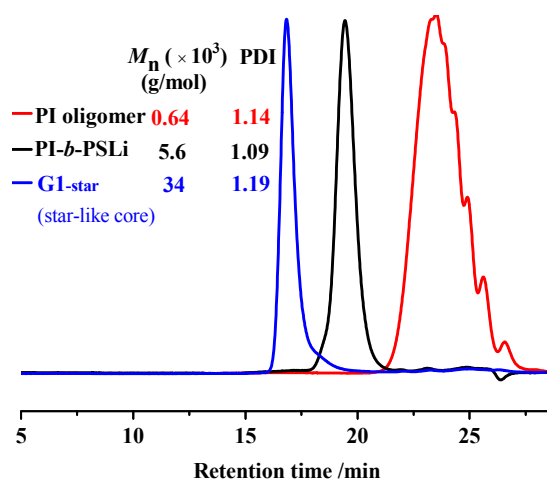

**Fig. S8** SEC monitoring the synthetic process of the star-like core.
